# Supplementary material
Source: Springer Nature journal article supplement (https://www.springermedizin.de/resource/supplementary/12889_2010_3483_MOESM2_ESM.pdf/9489178)

● solids/liquids poison

▲ hanging

— others

**(2a) Male**

**15-24y/o**

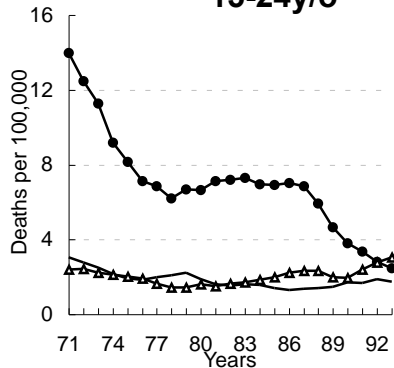

**25-44y/o**

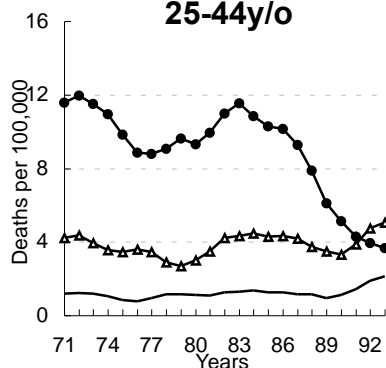

**45-64y/o**

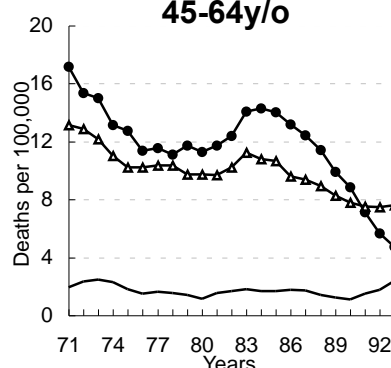

**65+y/o**

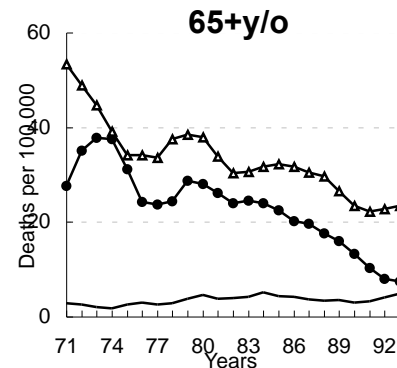

**(2b) Female**

**15-24y/o**

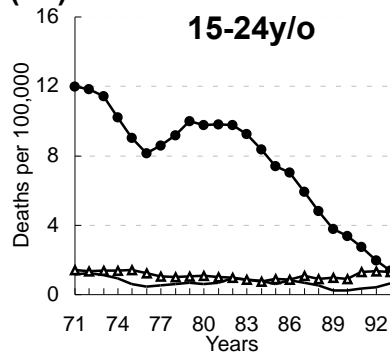

**25-44y/o**

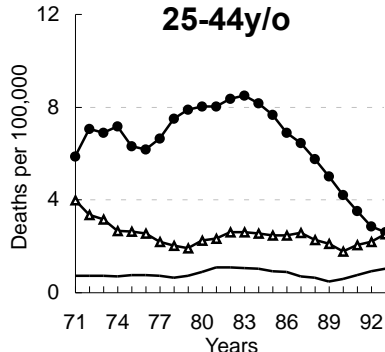

**45-64y/o**

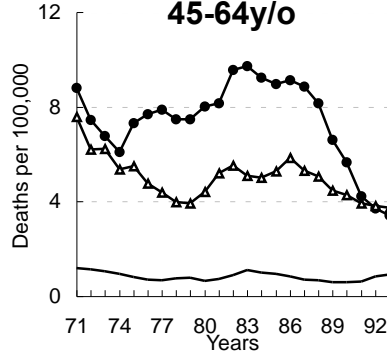

**65+y/o**

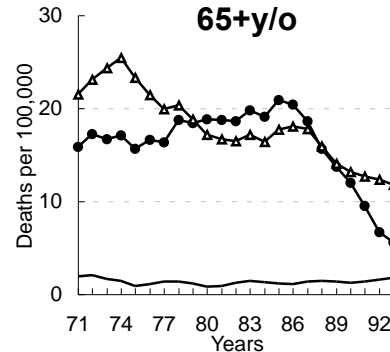

Supplement: MOESM2 [file 9489178]
